# Supplementary material
Source: MDPI journal article supplement (https://www.mdpi.com/2673-4591/56/1/195)
Supplement: s1 [file s1]

## Supporting information

### Synthesis, Spectral Characteristics, and Molecular Docking Studies of 2-(2,4-Dichlorophenoxy)-*N*-(2,2,2-Trichloro-1-(3-Arylthioureido)Ethyl)Acetamide <sup>†</sup>

Elizaveta R. Lominoga, Pavlo V. Zadorozhnii \*, Valeria V. Kobets, Vadym V. Kiselev, Aleksandr V. Kharchenko

Department of Pharmacy and Technology of Organic Substances, Ukrainian State University of Chemical Technology, Gagarin Ave 8, 49005 Dnipro, Ukraine; elizaveta.romanovna@gmail.com (E.R.L.); lv705757@gmail.com (V.V.K.); vadvitkis@gmail.com (V.V.K.); pashaalhimik@i.ua (A.V.K.)

\* Correspondence: torfp@i.ua; Tel.: +38-067-425-2710

<sup>†</sup> Presented at the 4th International Electronic Conference on Applied Sciences, 27 Oct–10 Nov 2023;

Available online: <https://asec2023.sciforum.net/>.

## Table of Contents

|       |                                                                                                                                                                              |    |
|-------|------------------------------------------------------------------------------------------------------------------------------------------------------------------------------|----|
| I.    | <sup>1</sup> H and <sup>13</sup> C NMR spectra of 2-(2,4-dichlorophenoxy)- <i>N</i> -(2,2,2-trichloro-1-(3-(2,4-dimethylphenyl)thioureido)ethyl)acetamide ( <b>7a</b> )..... | S2 |
| II.   | <sup>1</sup> H and <sup>13</sup> C NMR spectra of 2-(2,4-dichlorophenoxy)- <i>N</i> -(2,2,2-trichloro-1-(3-(2,5-dimethylphenyl)thioureido)ethyl)acetamide ( <b>7b</b> )..... | S3 |
| III.  | <sup>1</sup> H and <sup>13</sup> C NMR spectra of 2-(2,4-dichlorophenoxy)- <i>N</i> -(2,2,2-trichloro-1-(3-(2-methoxyphenyl)thioureido)ethyl)acetamide ( <b>7c</b> ).....    | S4 |
| IV.   | <sup>1</sup> H and <sup>13</sup> C NMR spectra of <i>N</i> -(1-(3-(4-acetamidophenyl)thioureido)-2,2,2-trichloroethyl)-2-(2,4-dichlorophenoxy)acetamide ( <b>7d</b> ).....   | S5 |
| V.    | <sup>1</sup> H and <sup>13</sup> C NMR spectra of ethyl 4-(3-(2,2,2-trichloro-1-(2-(2,4-dichlorophenoxy)acetamido)ethyl)thioureido)benzoate ( <b>7e</b> ).....               | S6 |
| VI.   | <sup>1</sup> H and <sup>13</sup> C NMR spectra of 2-(2,4-dichlorophenoxy)- <i>N</i> -(2,2,2-trichloro-1-(3-(2-chlorophenyl)thioureido)ethyl)acetamide ( <b>7f</b> ).....     | S7 |
| VII.  | <sup>1</sup> H and <sup>13</sup> C NMR spectra of <i>N</i> -(1-(3-(4-bromophenyl)thioureido)-2,2,2-trichloroethyl)-2-(2,4-dichlorophenoxy)acetamide ( <b>7g</b> ).....       | S8 |
| VIII. | <sup>1</sup> H and <sup>13</sup> C NMR spectra of 2-(2,4-dichlorophenoxy)- <i>N</i> -(2,2,2-trichloro-1-(3-(naphthalen-1-yl)thioureido)ethyl)acetamide ( <b>7h</b> ).....    | S9 |

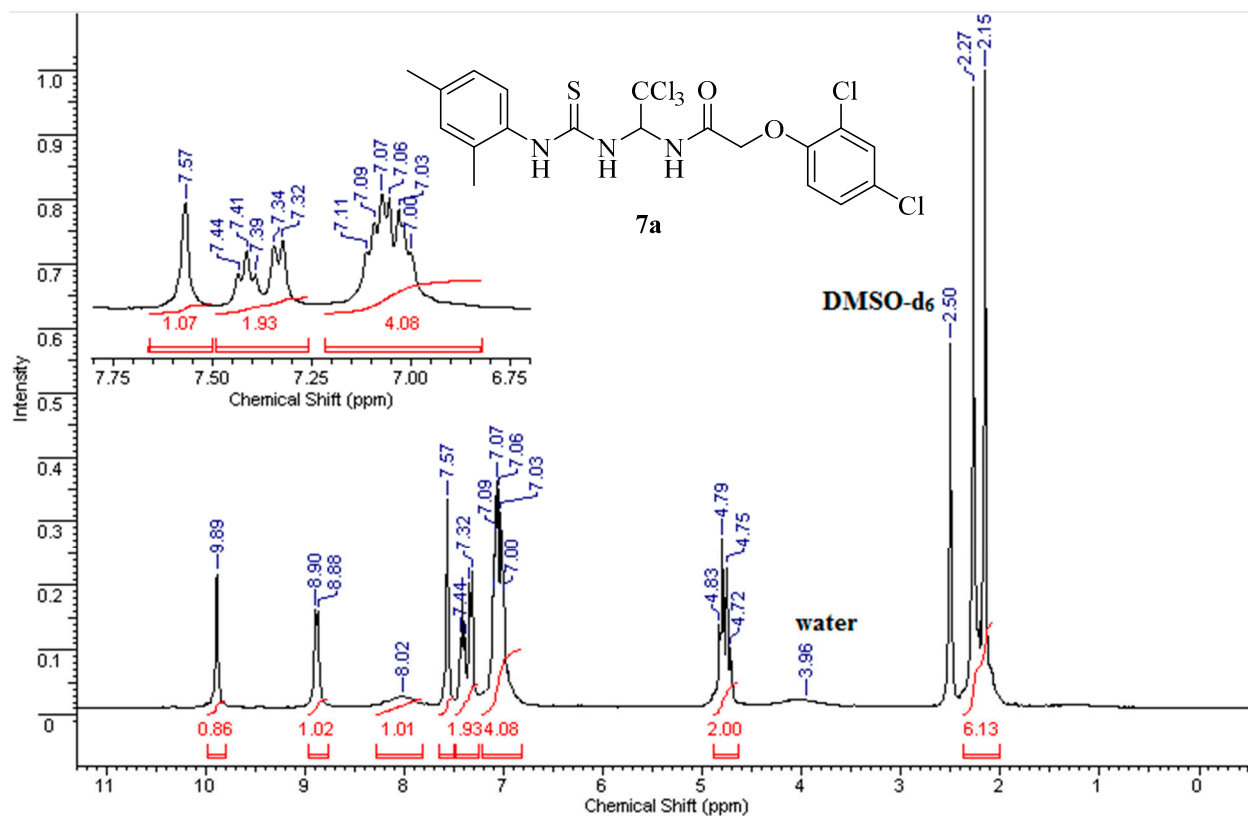

**Figure S1.** <sup>1</sup>H NMR (400 MHz, DMSO-d<sub>6</sub>) spectra of 2-(2,4-dichlorophenoxy)-N-(2,2,2-trichloro-1-(3-(2,4-dimethylphenyl)thioureido)ethyl)acetamide (**7a**).

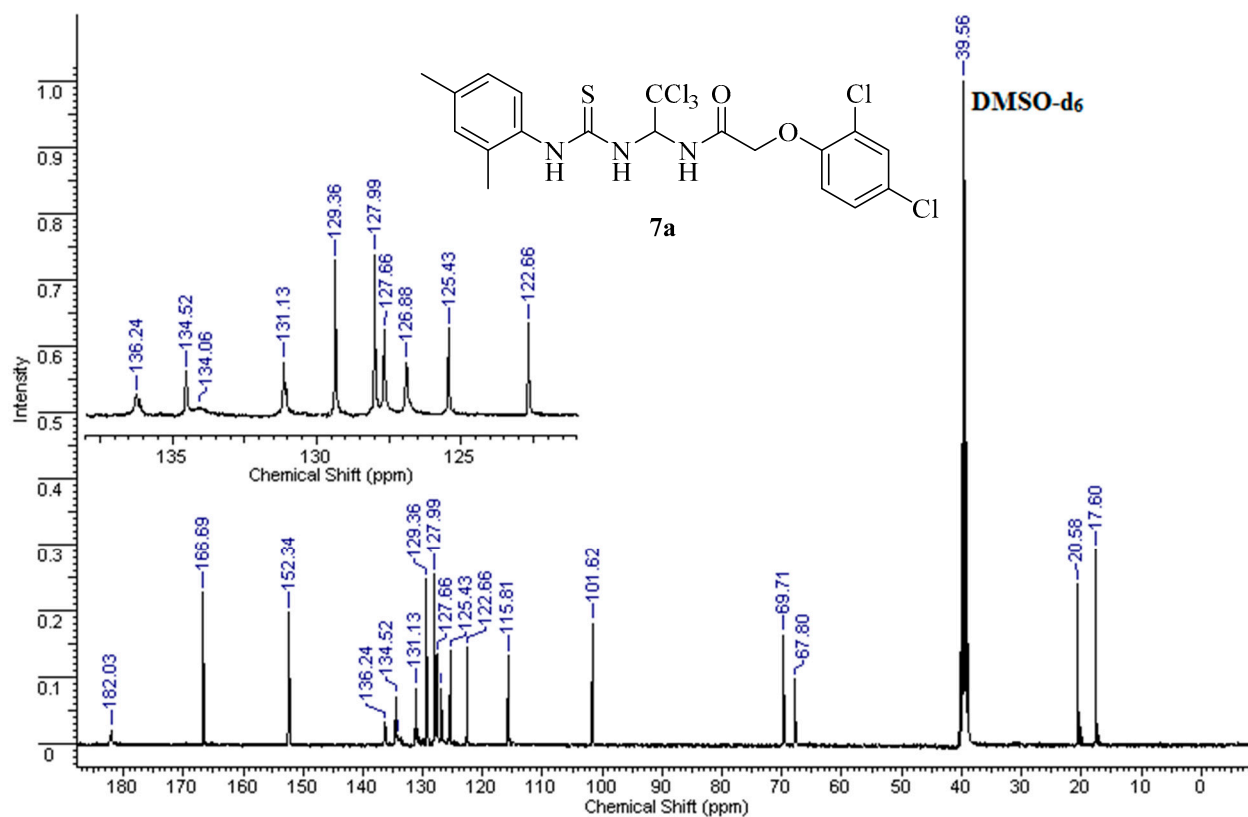

**Figure S2.** <sup>13</sup>C NMR (100 MHz, DMSO-d<sub>6</sub>) spectra of 2-(2,4-dichlorophenoxy)-N-(2,2,2-trichloro-1-(3-(2,4-dimethylphenyl)thioureido)ethyl)acetamide (**7a**).

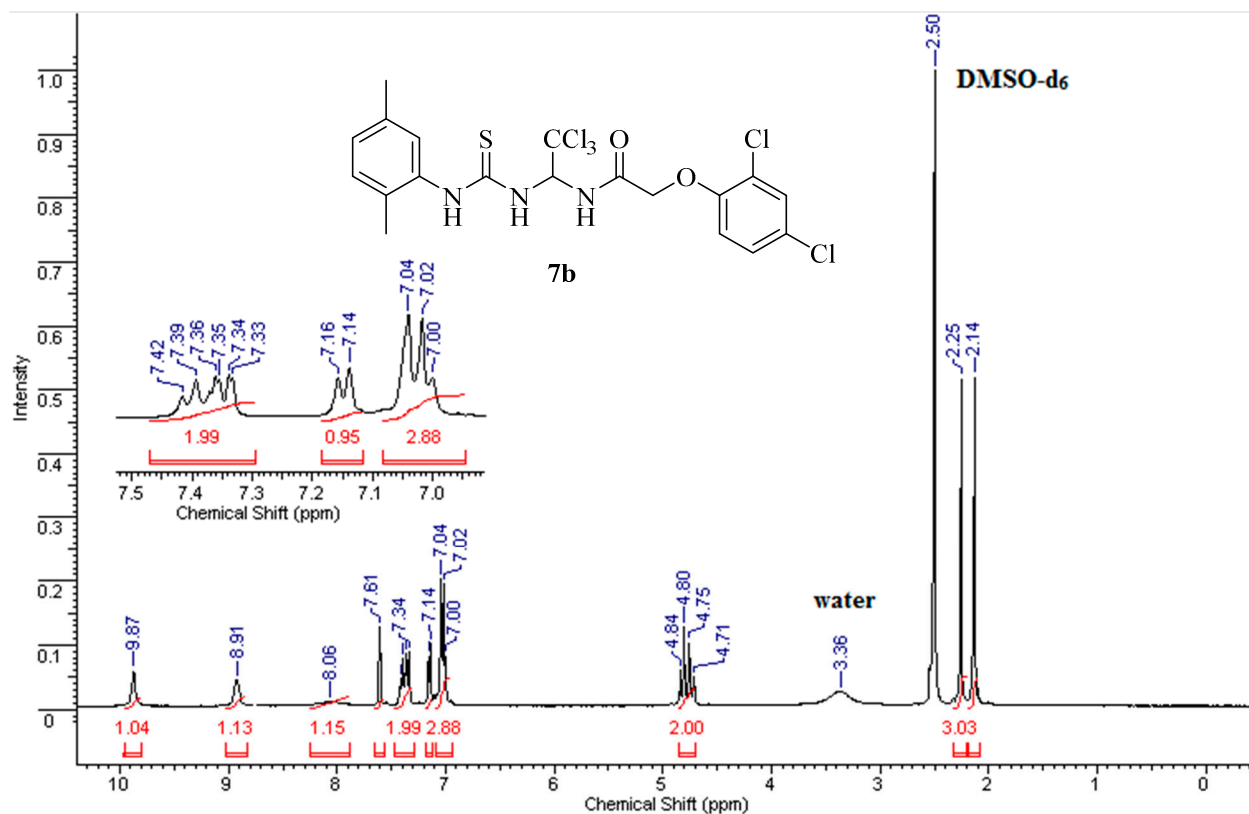

**Figure S3.** <sup>1</sup>H NMR (400 MHz, DMSO-d<sub>6</sub>) spectra of 2-(2,4-dichlorophenoxy)-*N*-(2,2,2-trichloro-1-(3-(2,5-dimethylphenyl)thioureido)ethyl)acetamide (**7b**).

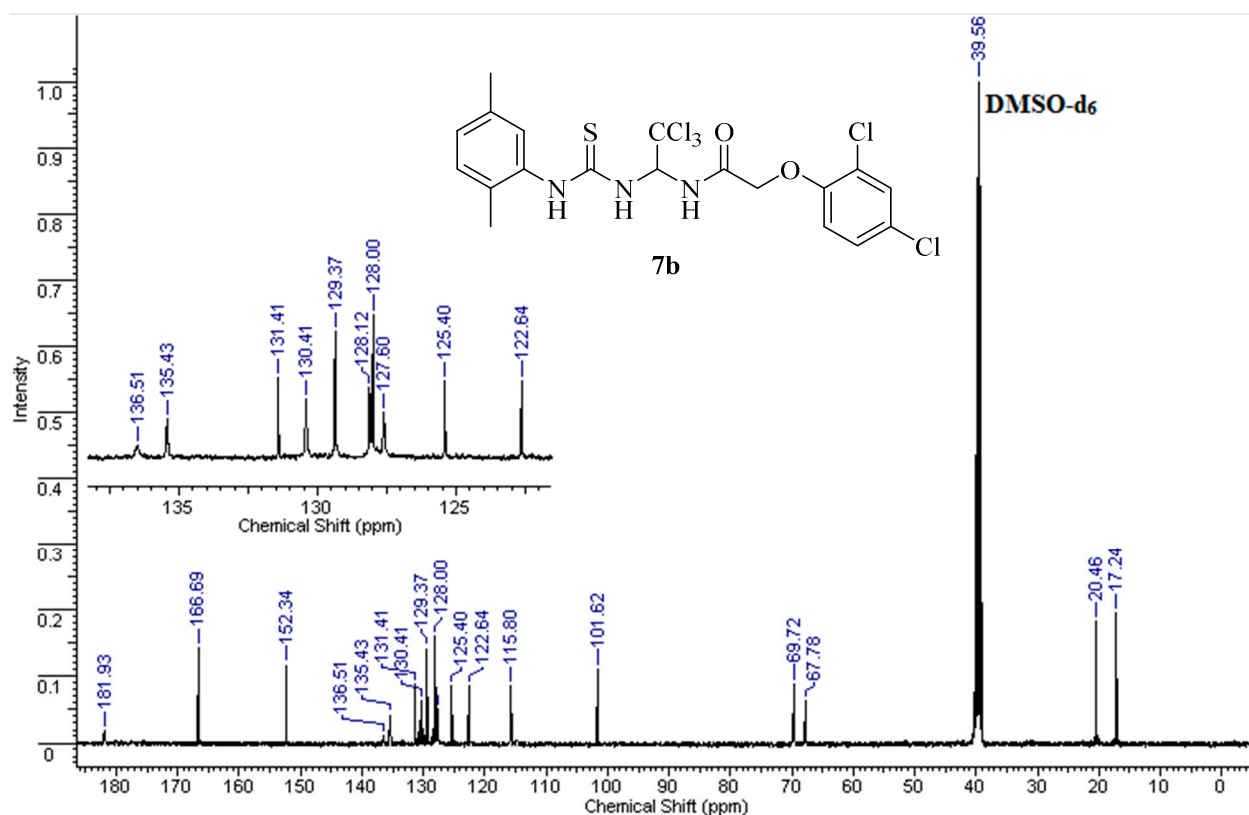

**Figure S4.** <sup>13</sup>C NMR (100 MHz, DMSO-d<sub>6</sub>) spectra of 2-(2,4-dichlorophenoxy)-*N*-(2,2,2-trichloro-1-(3-(2,5-dimethylphenyl)thioureido)ethyl)acetamide (**7b**).

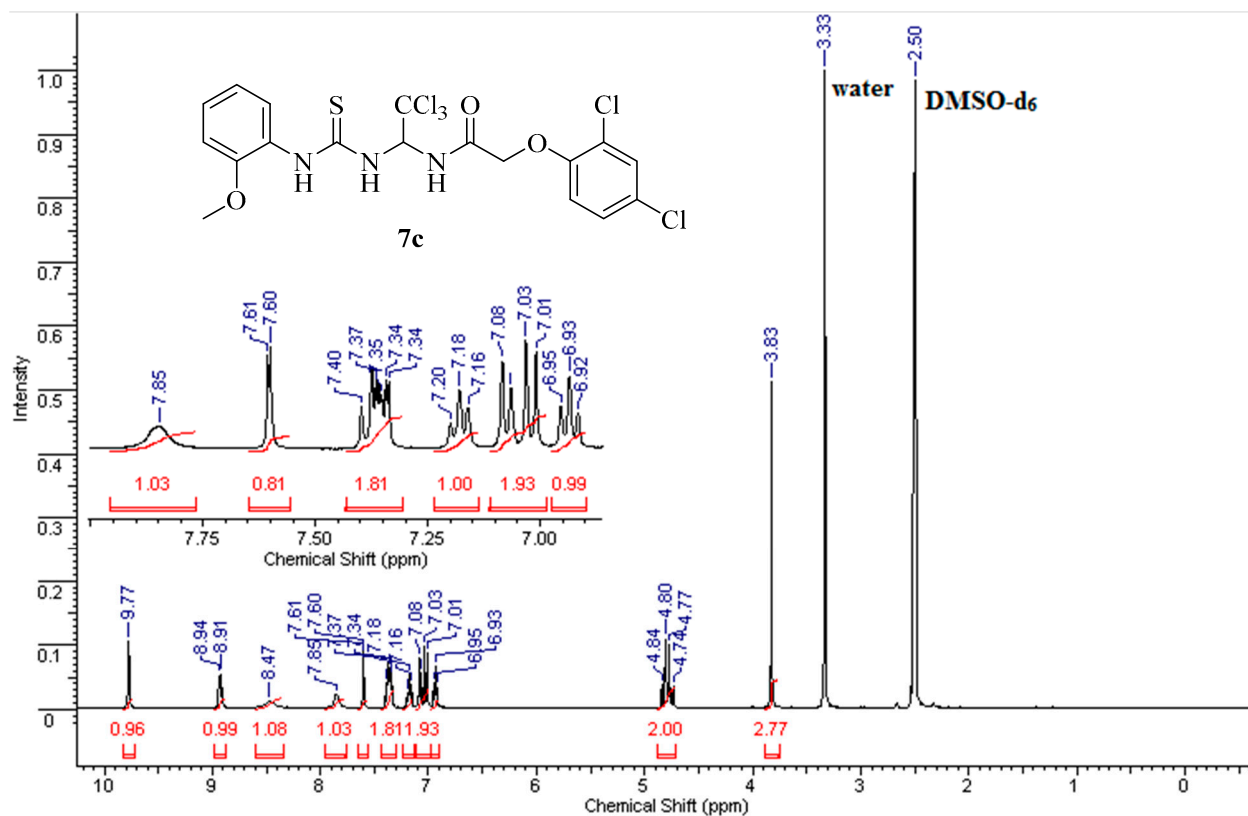

**Figure S5.**  $^1\text{H}$  NMR (400 MHz,  $\text{DMSO-d}_6$ ) spectra of 2-(2,4-dichlorophenoxy)-*N*-(2,2,2-trichloro-1-(3-(2-methoxyphenyl)thioureido)ethyl)acetamide (**7c**).

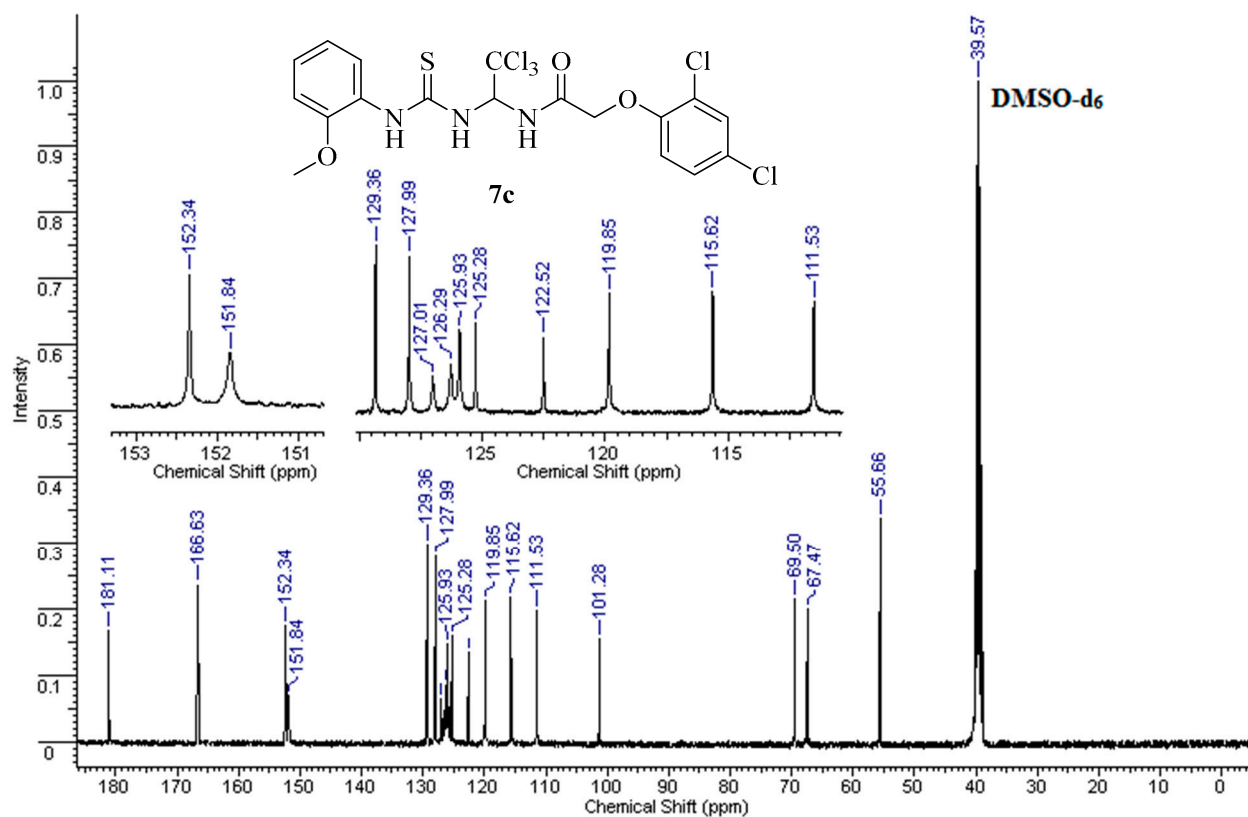

**Figure S6.**  $^{13}\text{C}$  NMR (100 MHz,  $\text{DMSO-d}_6$ ) spectra of 2-(2,4-dichlorophenoxy)-*N*-(2,2,2-trichloro-1-(3-(2-methoxyphenyl)thioureido)ethyl)acetamide (**7c**).

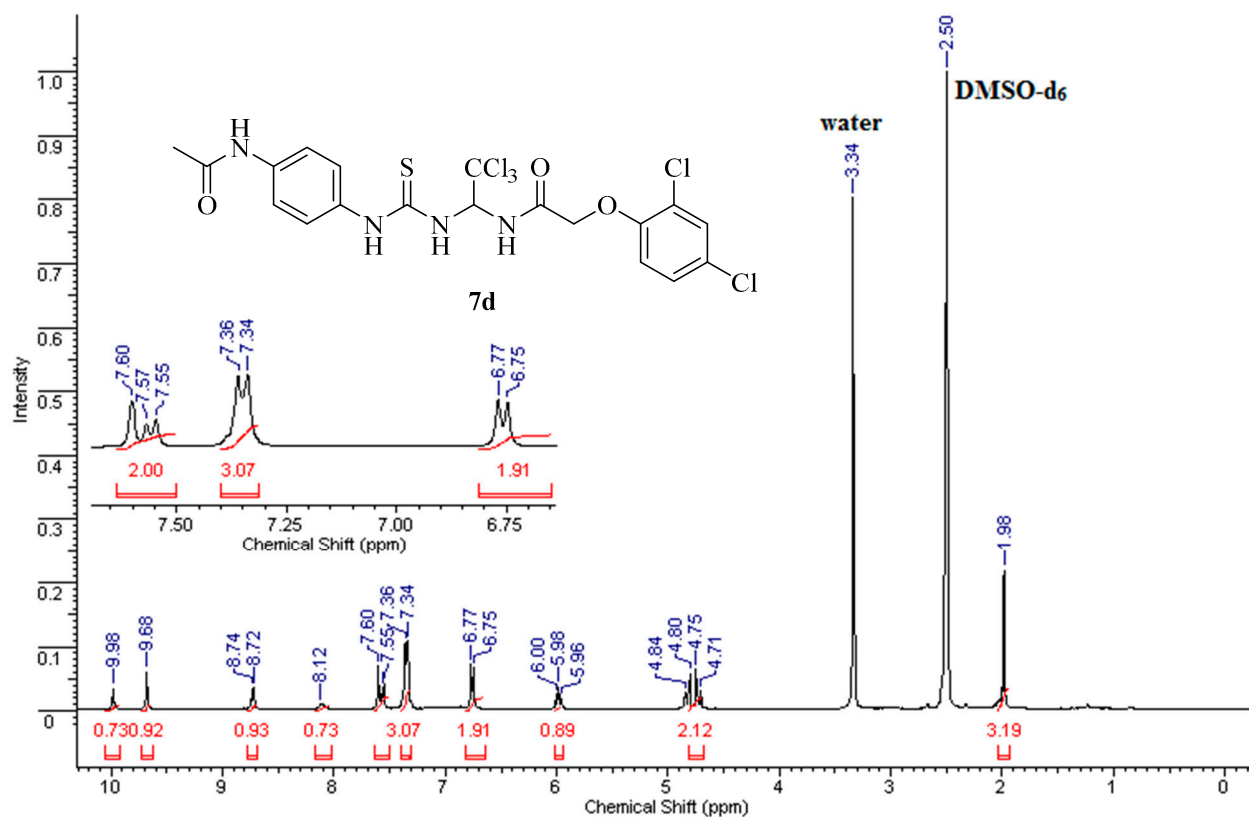

**Figure S7.** <sup>1</sup>H NMR (400 MHz, DMSO-d<sub>6</sub>) spectra of *N*-(1-(3-(4-acetamidophenyl)thioureido)-2,2,2-trichloroethyl)-2-(2,4-dichlorophenoxy)acetamide (**7d**).

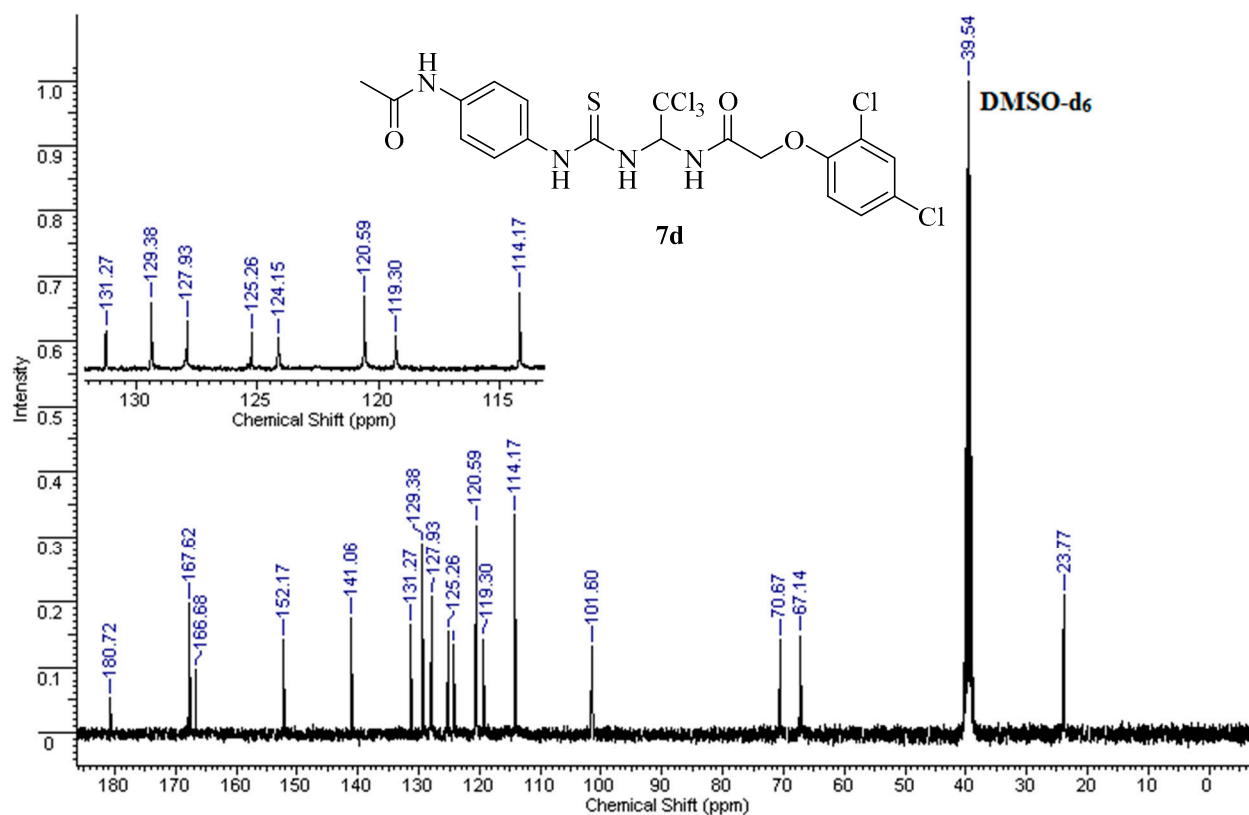

**Figure S8.** <sup>13</sup>C NMR (100 MHz, DMSO-d<sub>6</sub>) spectra of *N*-(1-(3-(4-acetamidophenyl)thioureido)-2,2,2-trichloroethyl)-2-(2,4-dichlorophenoxy)acetamide (**7d**).

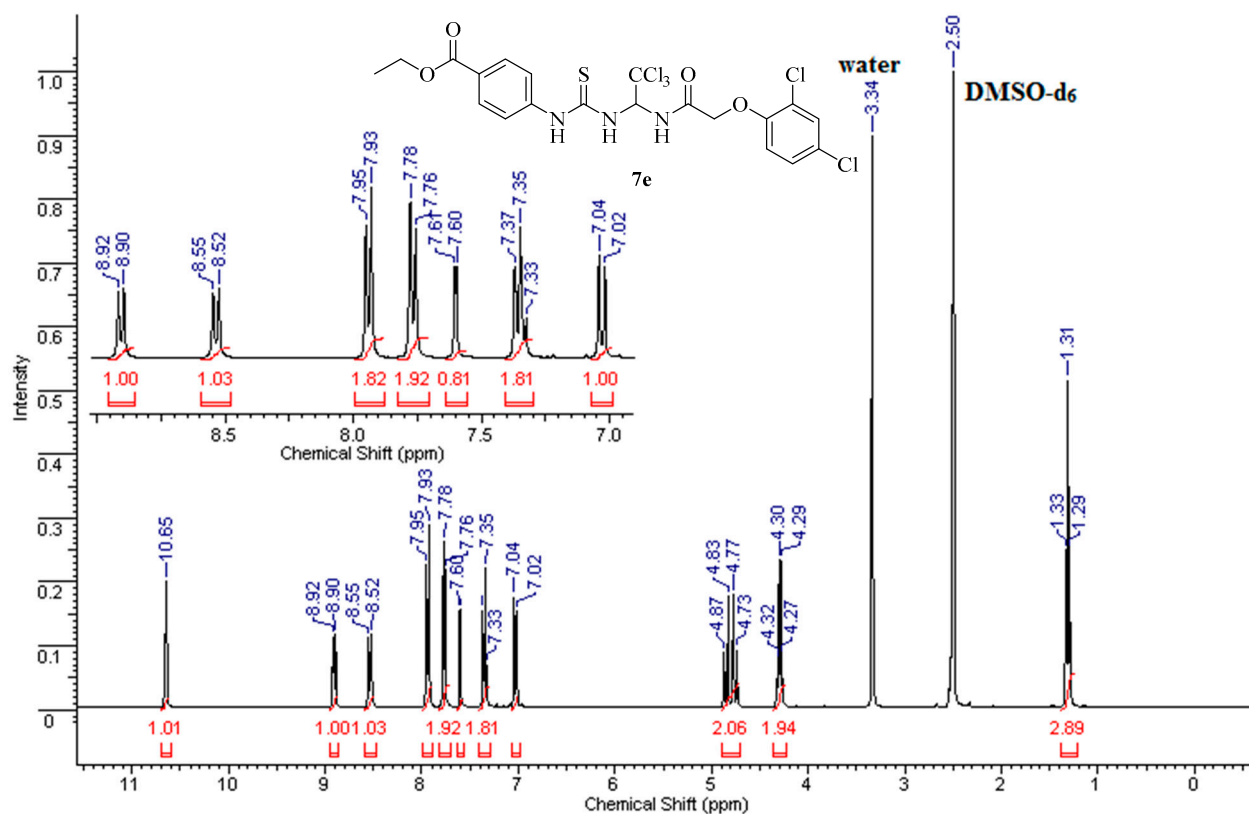

**Figure S9.**  $^1\text{H}$  NMR (400 MHz,  $\text{DMSO-d}_6$ ) spectra of ethyl 4-(3-(2,2,2-trichloro-1-(2-(2,4-dichlorophenoxy)acetamido)ethyl)thioureido)benzoate (**7e**).

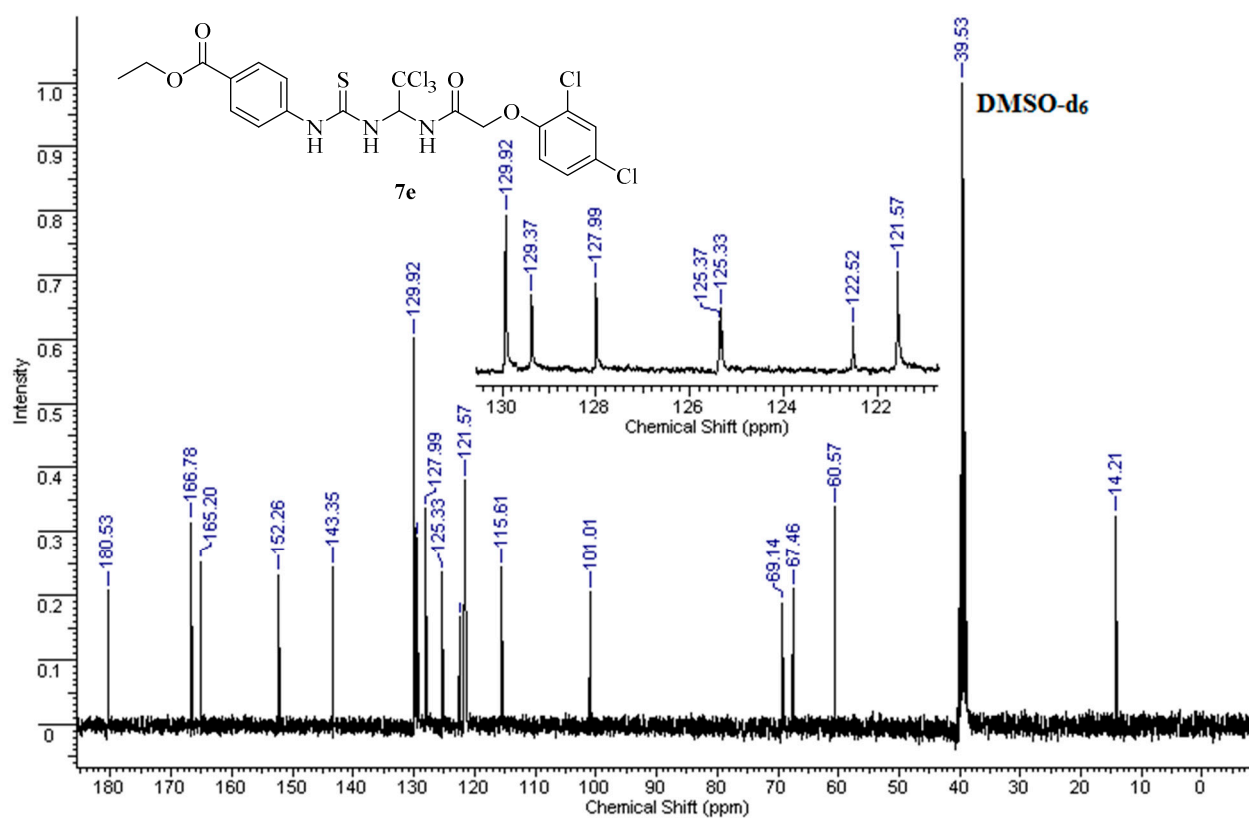

**Figure S10.**  $^{13}\text{C}$  NMR (100 MHz,  $\text{DMSO-d}_6$ ) spectra of ethyl 4-(3-(2,2,2-trichloro-1-(2-(2,4-dichlorophenoxy)acetamido)ethyl)thioureido)benzoate (**7e**).

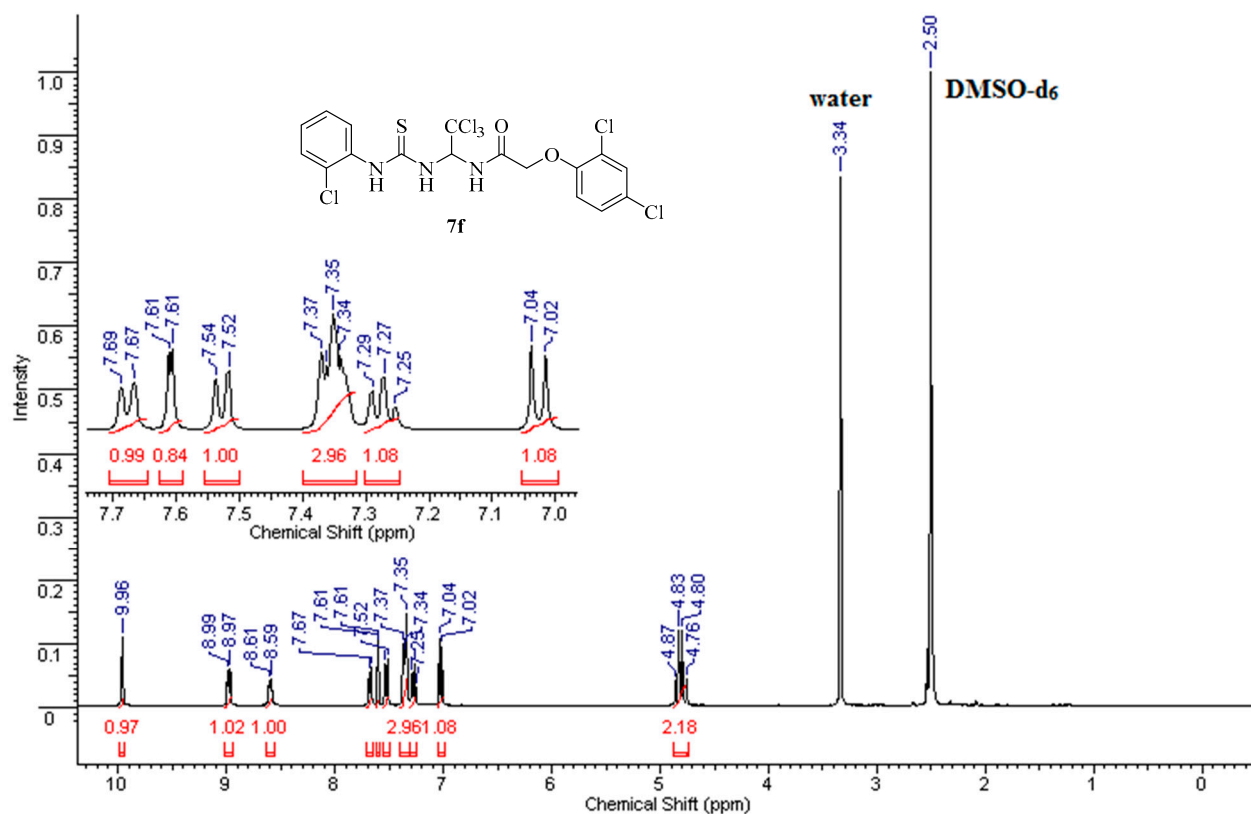

**Figure S11.** <sup>1</sup>H NMR (400 MHz, DMSO-d<sub>6</sub>) spectra of 2-(2,4-dichlorophenoxy)-*N*-(2,2,2-trichloro-1-(3-(2-chlorophenyl)thioureido)ethyl)acetamide (**7f**).

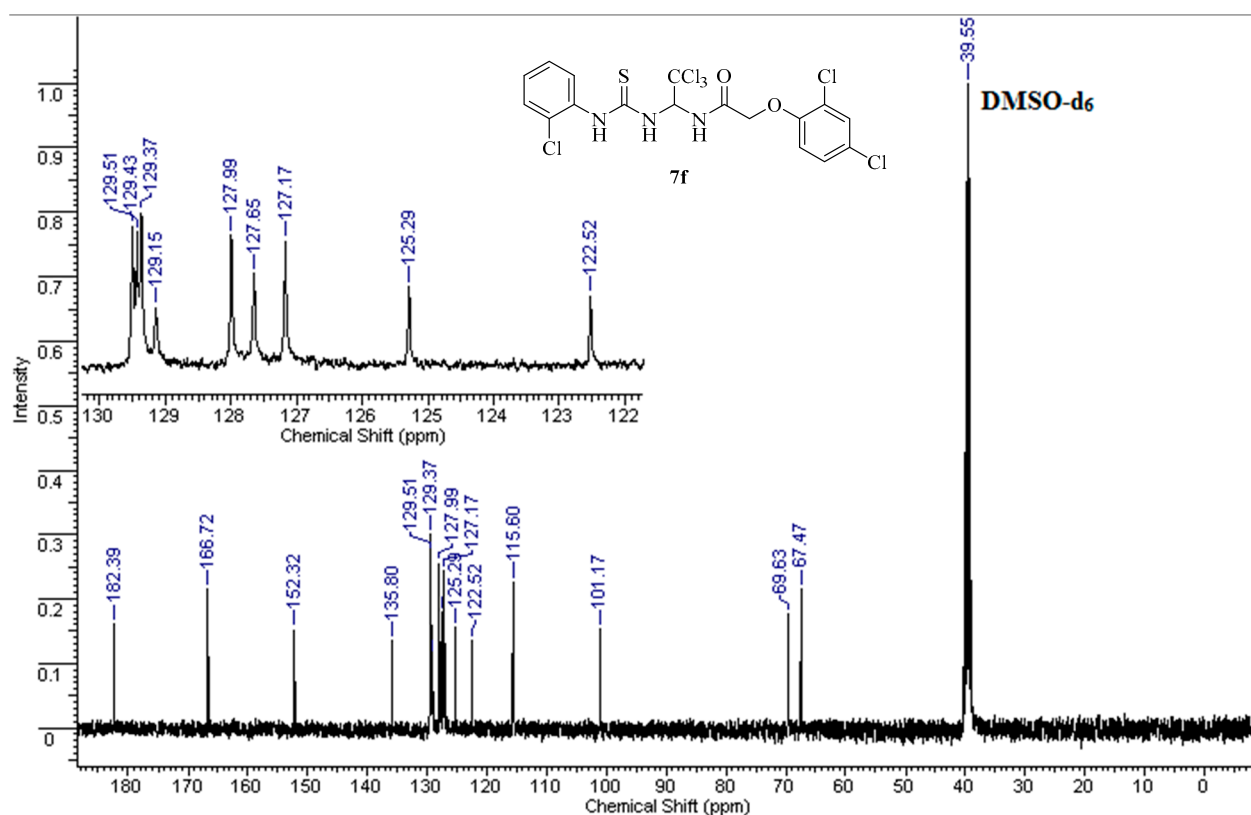

**Figure S12.** <sup>13</sup>C NMR (100 MHz, DMSO-d<sub>6</sub>) spectra of 2-(2,4-dichlorophenoxy)-*N*-(2,2,2-trichloro-1-(3-(2-chlorophenyl)thioureido)ethyl)acetamide (**7f**).



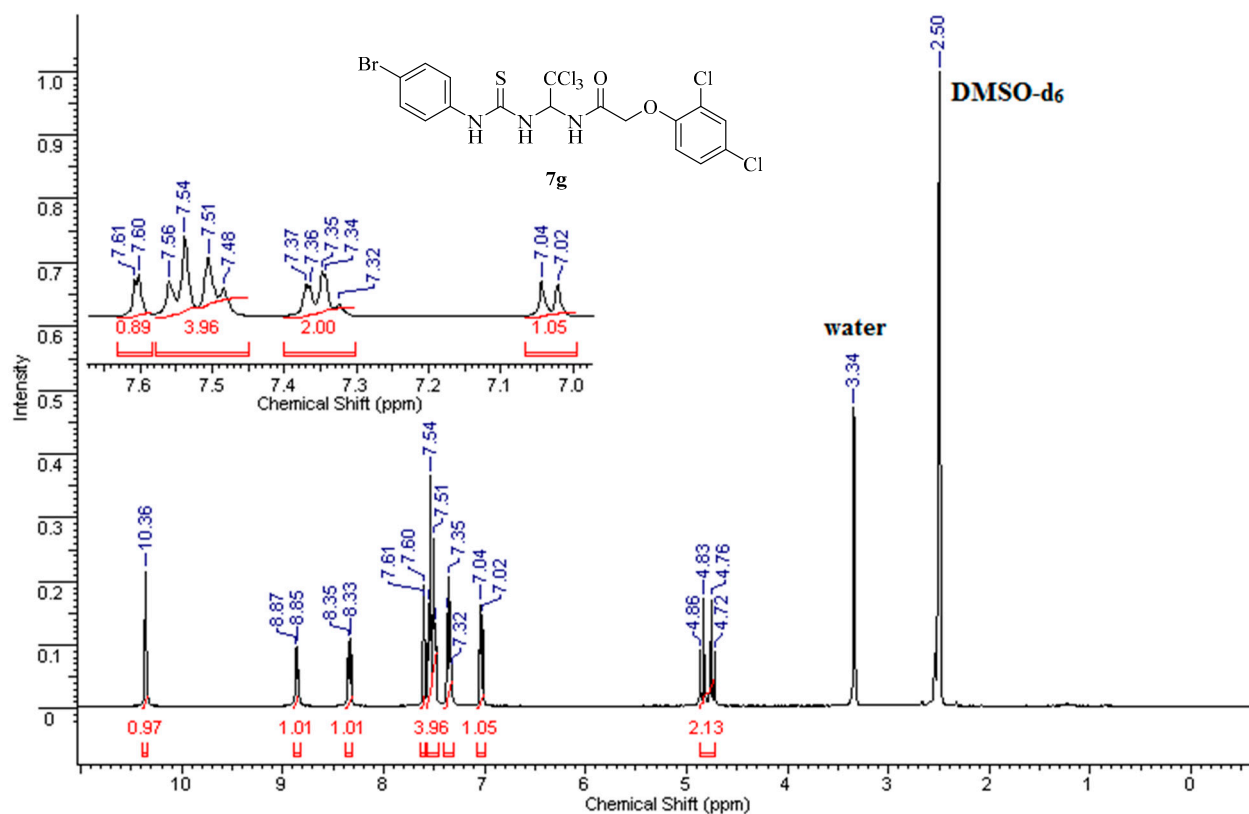

**Figure S13.** <sup>1</sup>H NMR (400 MHz, DMSO-d<sub>6</sub>) spectra of *N*-(1-(3-(4-bromophenyl)thioureido)-2,2,2-trichloroethyl)-2-(2,4-dichlorophenoxy)acetamide (**7g**).

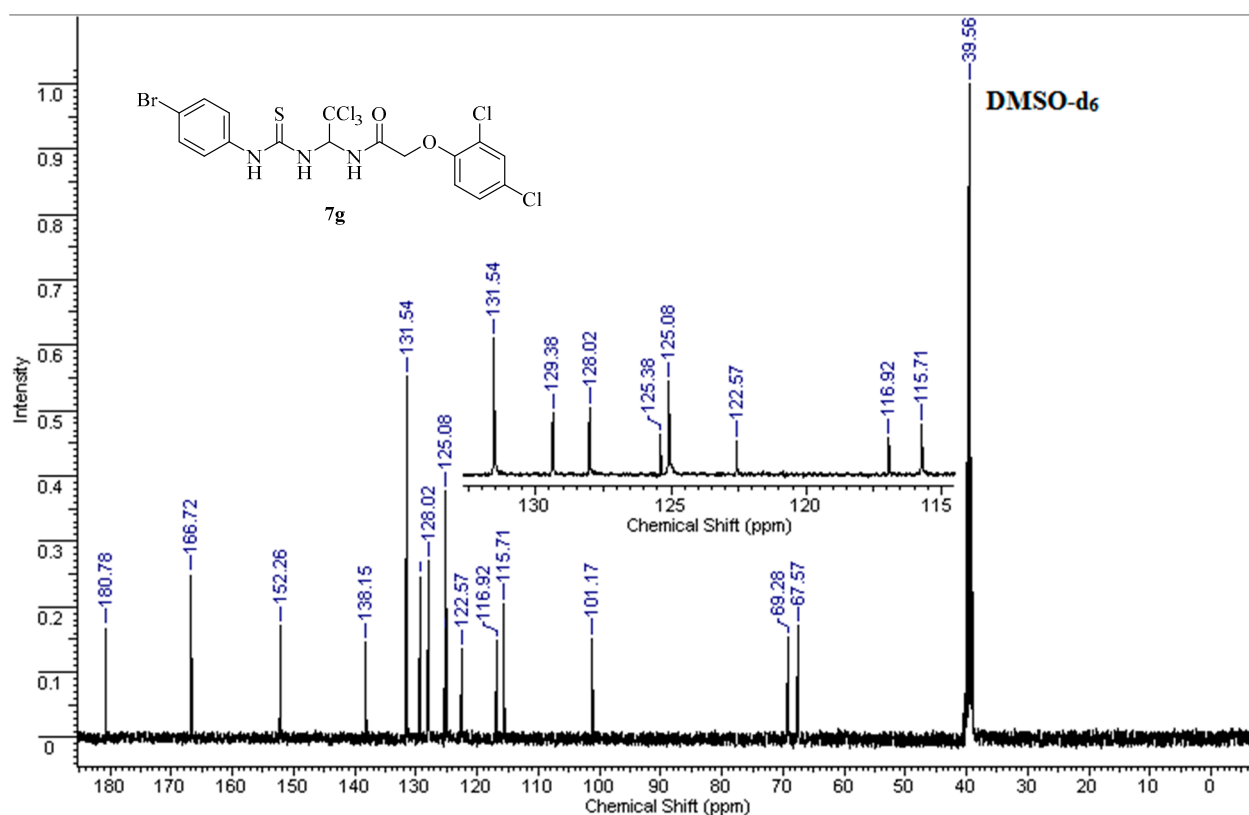

**Figure S14.** <sup>13</sup>C NMR (100 MHz, DMSO-d<sub>6</sub>) spectra of *N*-(1-(3-(4-bromophenyl)thioureido)-2,2,2-trichloroethyl)-2-(2,4-dichlorophenoxy)acetamide (**7g**).



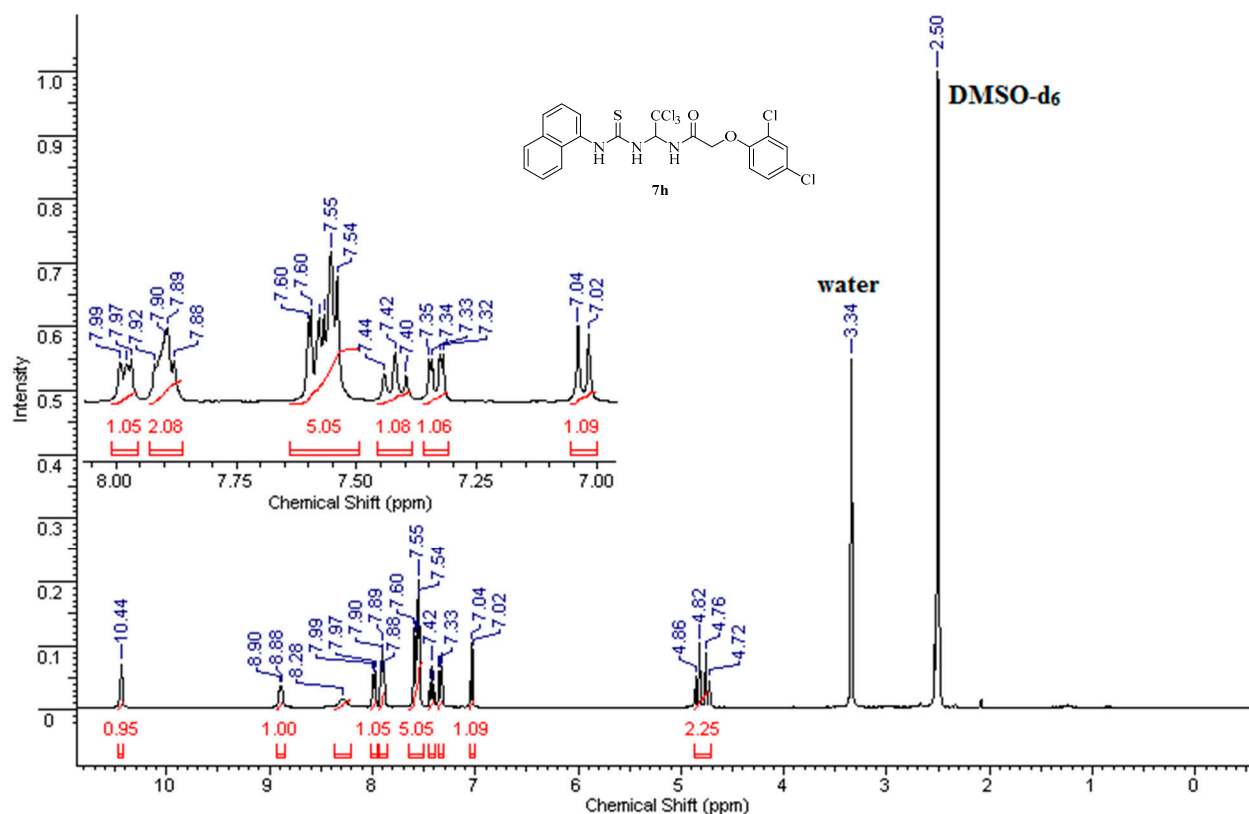

**Figure S15.** <sup>1</sup>H NMR (400 MHz, DMSO-d<sub>6</sub>) spectra of 2-(2,4-dichlorophenoxy)-N-(2,2,2-trichloro-1-(3-(naphthalen-1-yl)thioureido)ethyl)acetamide (**7h**).

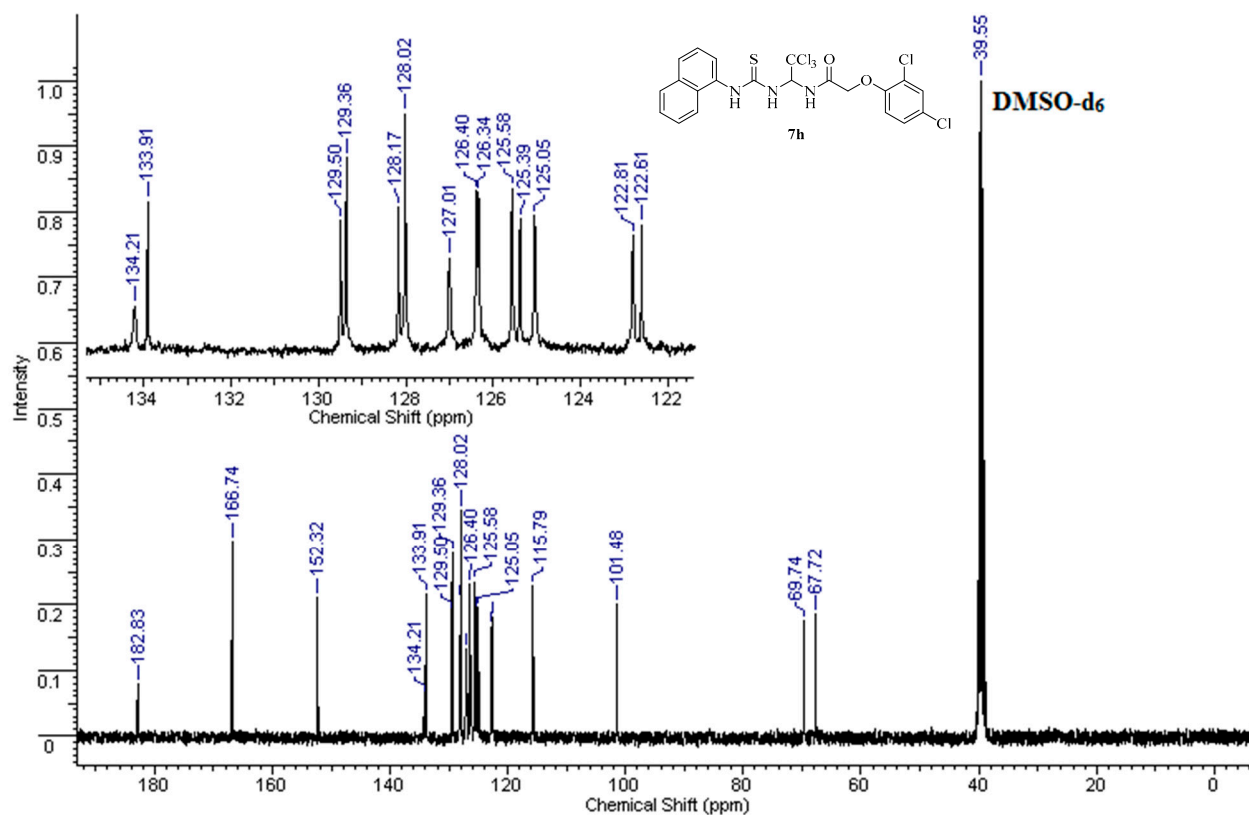

**Figure S16.** <sup>13</sup>C NMR (100 MHz, DMSO-d<sub>6</sub>) spectra of 2-(2,4-dichlorophenoxy)-N-(2,2,2-trichloro-1-(3-(naphthalen-1-yl)thioureido)ethyl)acetamide (**7h**).
